# Supplementary material
Source: PubMed Central journal article supplement (PMC7097302)
Supplement: joces-133-236158-s1.pdf [file joces-133-236158-s1.pdf]

A.

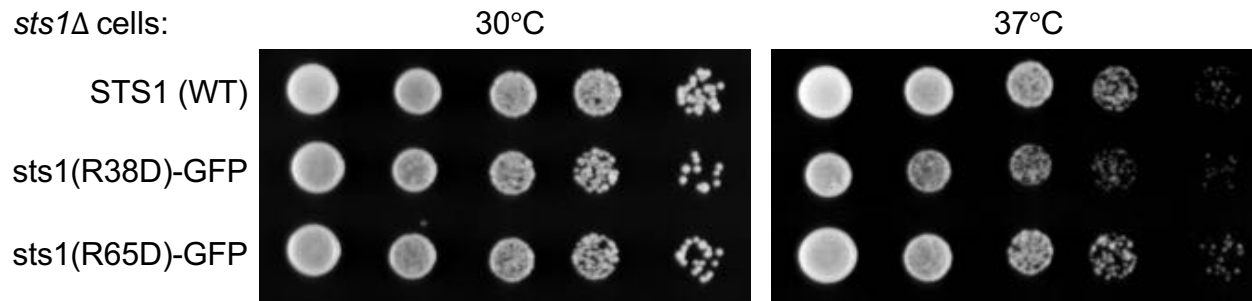

B.

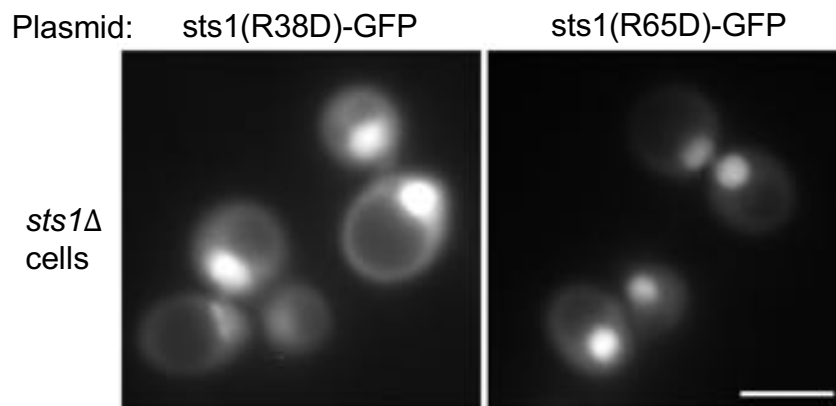

**Figure S1. The *sts1-R38D* mutant has minor growth and localization defects.**

(A) MHY9580 (*sts1* $\Delta$ /pRS316-STS1) was transformed with p415MET25-STS1-GFP, p415MET25-*sts1*R38D-GFP, or p415MET25-*sts1*R65D-GFP. These transformants were struck on 5-FOA plates to select against pRS316-STS1. The resulting strains were spotted in 6-fold serial dilutions on SD complete plates and grown at 30°C or 37°C for 2 days. (B) The *sts1* NLS single-mutant GFP fusions were expressed from p415GPD vectors at 30°C and visualized by fluorescence microscopy. Scale bar, 5  $\mu$ m. Greater defects due to mutation of the N-terminal basic segment is typical of bipartite NLSs.

A.

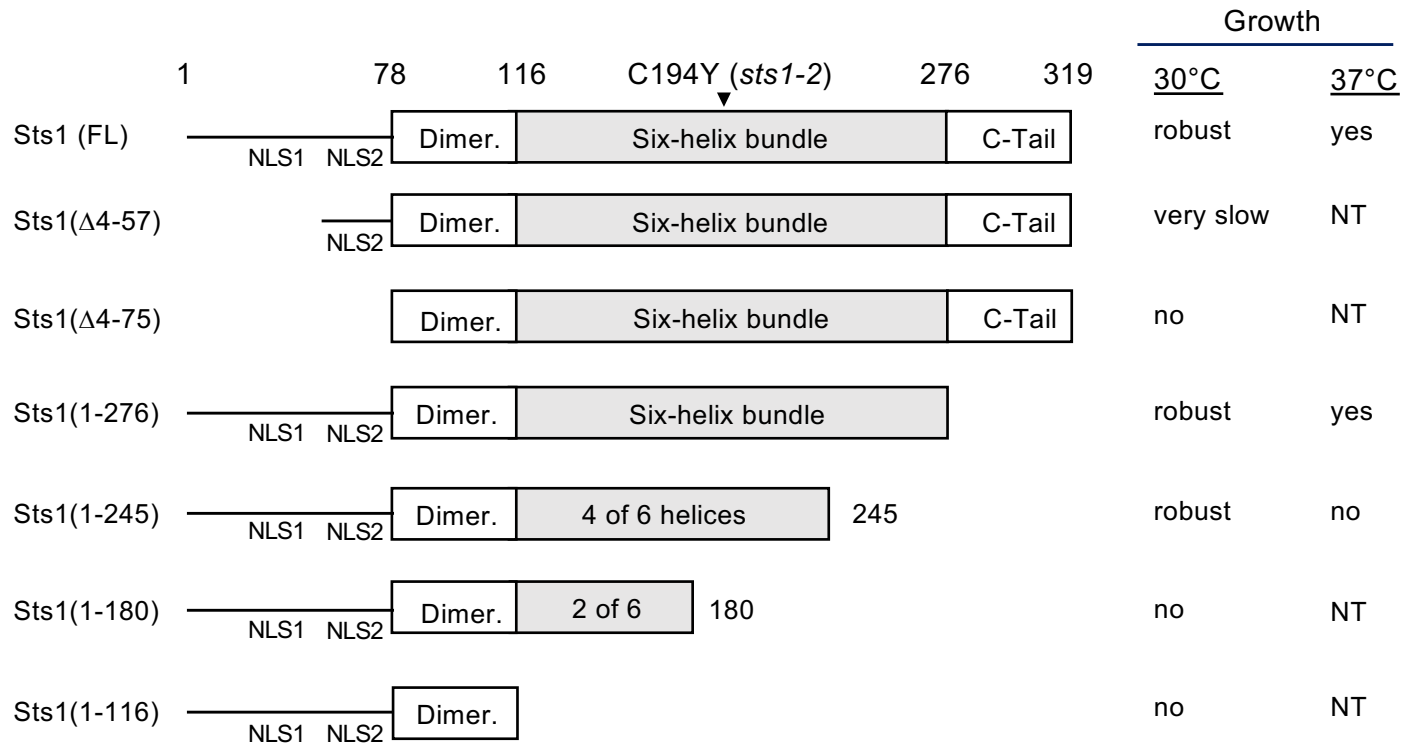

B.

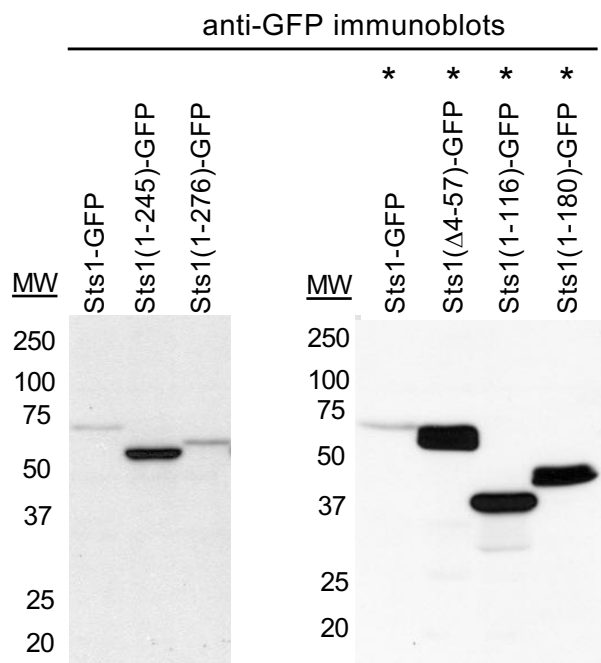

C.

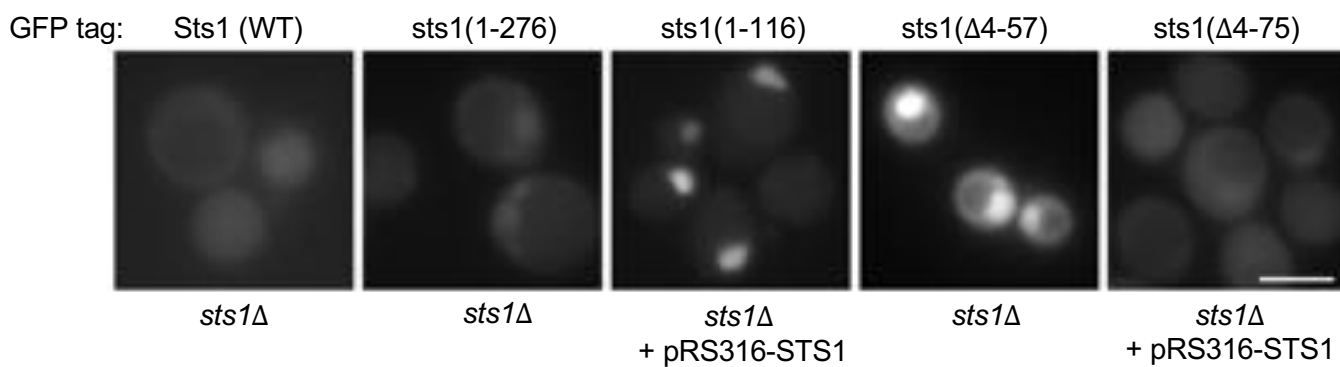

**Figure S2. Truncated forms of Sts1 with impaired function are more abundant in cells.**

(A) Plasmids bearing the *MET25* promoter and coding for the indicated regions of the Sts1 protein, all bearing a C-terminal GFP extension, were transformed into a strain (MHY9579) deleted for *STS1* on the chromosome and carrying pRS316-STS1. Two resulting transformants for each plasmid were struck on media containing 5-FOA to eject the pRS316-STS1 plasmid. Growth of these transformants at 30°C on media containing 5-FOA is indicated in the left column. For strains that grew well at 30°C, growth on YPD at 37°C was tested, and the results are shown. NT = not tested. (B) Equal amounts of cells (assayed by optical density measurement) were lysed, and the cell extracts were subjected to immunoblot analysis for the various Sts1-GFP proteins expressed in part A. For plasmids that allowed growth of the *sts1*Δ strain on 5-FOA, expression was tested in a strain expressing the Sts1-GFP protein as the only form of Sts1. For plasmids that did not allow replacement of pRS316-STS1 (as indicated by asterisks), extracts of WT cells expressing these proteins were used. The expected size for full-length Sts1-GFP is ~65 kD. (C) Localization of select GFP-tagged Sts1 proteins expressed with the *MET25* promoter on a low-copy plasmid. Scale bar, 5 μm.

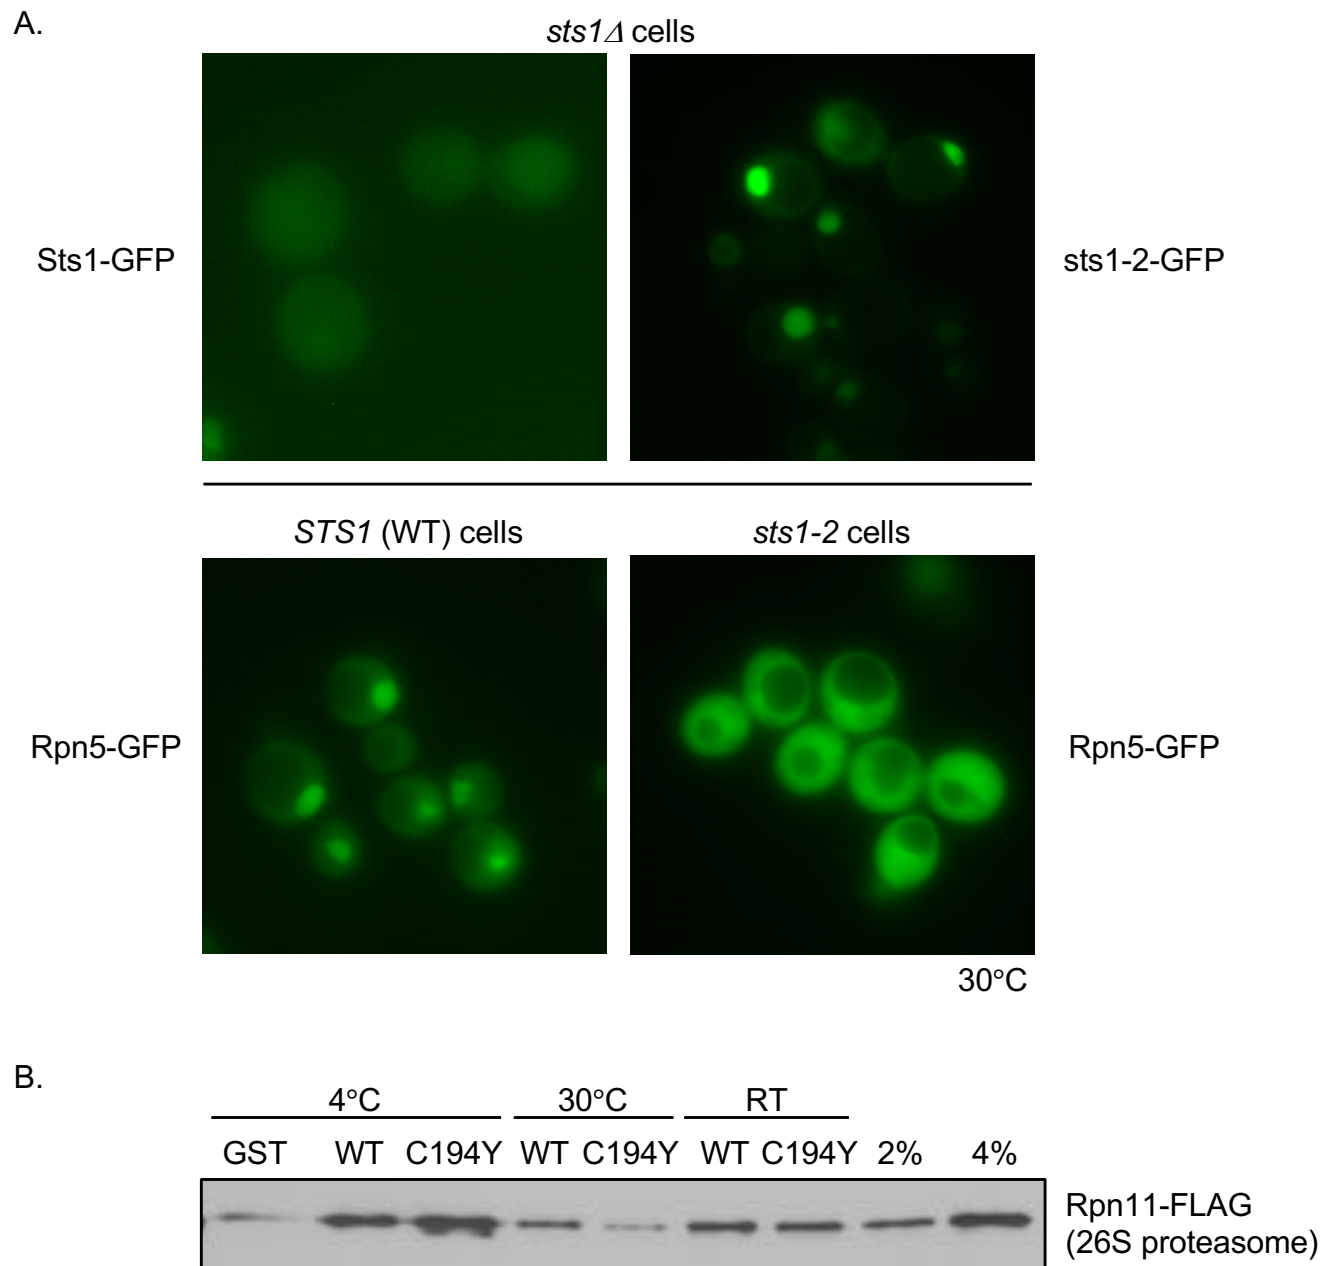

**Figure S3. The *sts1-2* mutation (C194Y) allows Sts1 nuclear concentration but impairs proteasome binding and nuclear localization.**

(A) To localize Sts1 derivatives (top row), MHY9579 (*sts1Δ* [pRS316STS1]) cells were transformed with pRS415MET25 plasmids expressing the indicated GFP fusions, and the original plasmid was evicted on 5-FOA. Only low levels of WT Sts1 accumulate under these expression condition. For proteasome localization, a low-copy plasmid expressing Rpn5-GFP (native promotor) was transformed into WT and *sts1-2* mutant cells and visualized by fluorescence microscopy of live cells at 30°C. (B) Binding of 26S proteasomes to Sts1-Srp1. Proteasomes (1 μM) affinity purified from yeast were mixed with GST-Srp1/Sts1-6His (1 μM) at the indicated temperatures and loaded on GSH resin. Eluted proteins were examined by anti-Flag immunoblotting. The *sts1*-C194Y exhibited temperature-sensitive proteasome binding. First lane, GST only control; proteasome inputs shown at right.

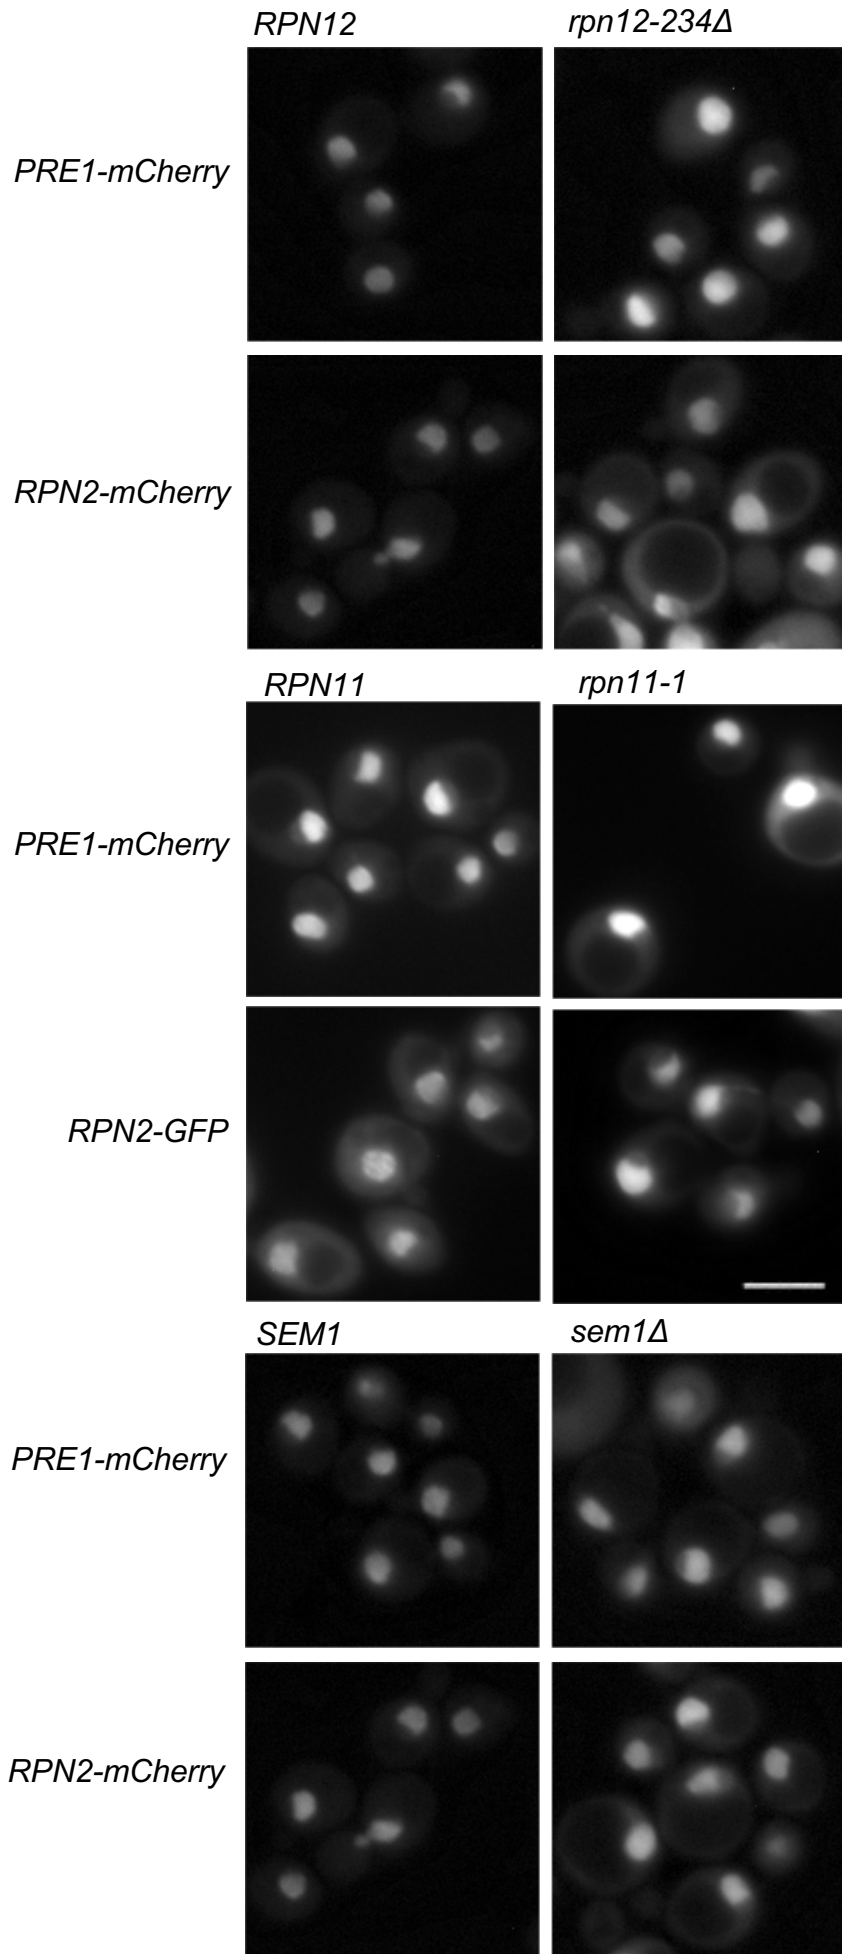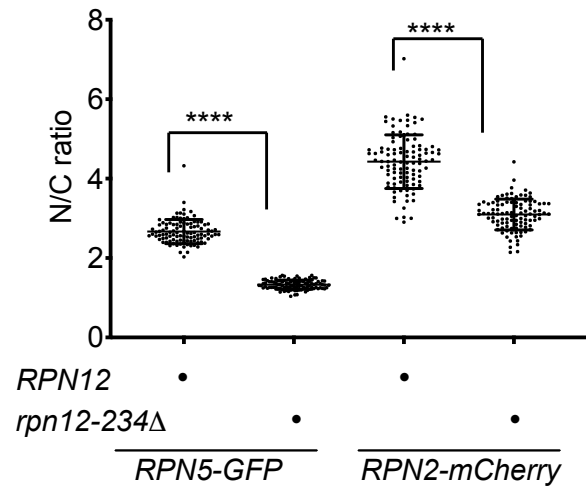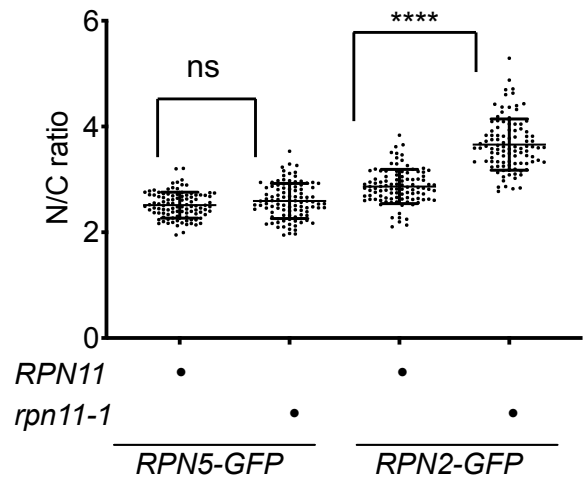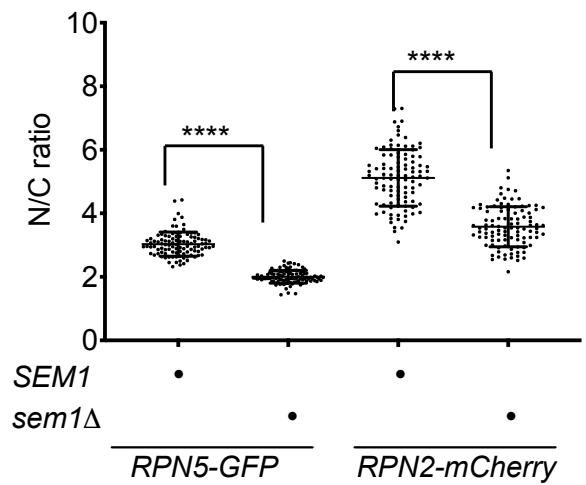

**Figure S4. Localization of base and CP in lid mutants.** Proteasome assembly mutants were grown in SD-complete media to log phase and imaged by fluorescence microscopy; three replicates of at least 100 cells each were counted. ANOVA was used to determine statistical significance of differences (\*\*\*\*  $p < 0.0001$ ). Scale bar is 5  $\mu\text{m}$ . Yeast strains used were MHY6938, MHY6946, MHY6954, MHY6956, MHY6964, MHY6966, MHY9172, MHY9174, MHY9573, and MHY9581.

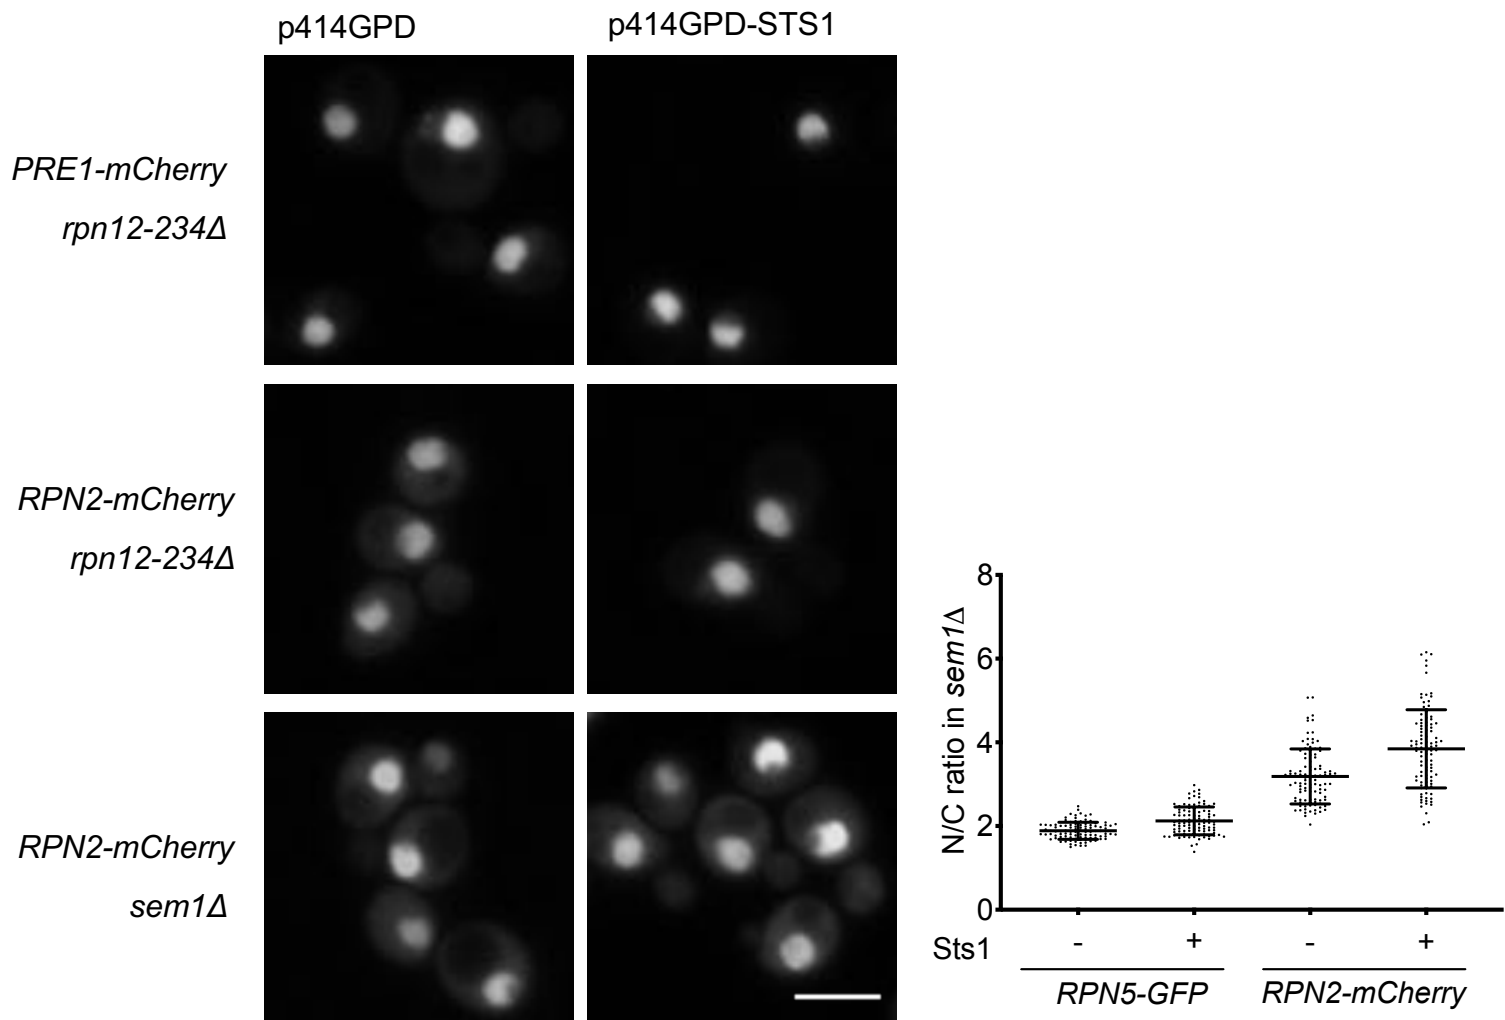

**Figure S5. Effect of *STs1* overexpression on base and CP localization in lid mutants.**

In the *rpn12-234Δ* mutant, both base and CP subunits show increased nuclear localization upon *Sts1* overexpression. The very low cytoplasmic signals precluded accurate measurement of N/C signal ratios. Microscopy was performed as in Fig. 5 with 3 replicates of at least 100 cells per replicate counted. Yeast strains used were MHY6954, MHY6964, and MHY9174.

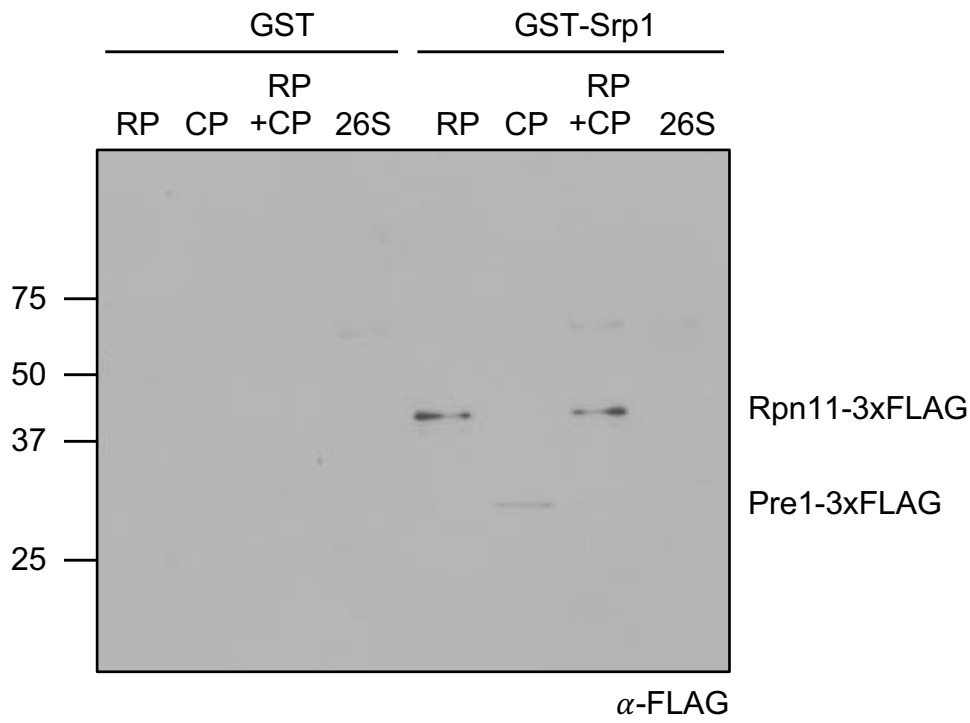

**Figure S6. GST and GST-Srp1 control pulldowns of proteasome species.**

Recombinant GST-Srp1/Sts1-6His complex or GST alone was immobilized on glutathione (GSH) resin and incubated with purified CP, RP, reconstituted CP+RP, or 26S proteasome. Anti-Flag immunoblot of tagged subunits.



**Table S1. Yeast Strains Used in This Study**

| Strain  | Genotype                                                                                                               | Source                  |
|---------|------------------------------------------------------------------------------------------------------------------------|-------------------------|
| MHY500  | <i>MATa his3Δ200 leu2-3,112 ura3-52 lys2-801 trp1-1 gal2</i>                                                           | (Chen et al. 1993)      |
| MHY5748 | <i>MATa his3Δ200 leu2-3,112 ura3-52 lys2-801 trp1-1 gal2 rpn12-234Δ:hphMX4</i>                                         | (Tomko, 2011)           |
| MHY5841 | <i>MATa his3Δ200 leu2-3,112 ura3-52 lys2-801 trp1-1 gal2 RPN11-6xGly-3xFLAG:kanMX6</i>                                 | (Li et al., 2015)       |
| MHY6952 | <i>MATa his3Δ200 leu2-3,112 ura3-52 lys2-801 trp1-1 gal2 PRE1-6xGly-3xFLAG:kanMX6</i>                                  | (Li et al., 2015)       |
| MHY6377 | <i>MATa his3Δ200 leu2-3,112 ura3-52 lys2-801 trp1-1 gal2 RPN5-GFP(S65T):HIS3MX6</i>                                    | R. Tomko, MH lab strain |
| MHY6824 | <i>MATa his3Δ200 leu2-3,112 ura3-52 lys2-801 trp1-1 gal2 rpn12-234Δ:hphMX4 RPN5-GFP(S65T):HIS3MX6</i>                  | R. Tomko, MH lab strain |
| MHY6938 | <i>MATa his3Δ200 leu2-3,112 ura3-52 lys2-801 trp1-1 gal2 PRE1-mCherry:NAT</i>                                          | R. Tomko, MH lab strain |
| MHY6946 | <i>MATa his3Δ200 leu2-3,112 ura3-52 lys2-801 trp1-1 gal2 RPN2-GFP(S65T):kanMX6</i>                                     | R. Tomko, MH lab strain |
| MHY6954 | <i>MATa his3Δ200 leu2-3,112 ura3-52 lys2-801 trp1-1 gal2 RPN5-GFP(S65T):HIS3MX6 PRE1-mCherry:NAT rpn12-234Δ:hphMX4</i> | R. Tomko, MH lab strain |
| MHY6956 | <i>MATa his3Δ200 leu2-3,112 ura3-52 lys2-801 trp1-1 gal2 RPN5-GFP(S65T):HIS3MX6 PRE1-mCherry:NAT</i>                   | R. Tomko, MH lab strain |
| MHY6964 | <i>MATa his3Δ200 leu2-3,112 ura3-52 lys2-801 trp1-1 gal2 RPN5-GFP(S65T):HIS3MX6 RPN2-mCherry:NAT rpn12-234Δ:hphMX4</i> | R. Tomko, MH lab strain |
| MHY6966 | <i>MATa his3Δ200 leu2-3,112 ura3-52 lys2-801 trp1-1 gal2 RPN5-GFP(S65T):HIS3MX6 RPN2-mCherry:NAT</i>                   | R. Tomko, MH lab strain |
| MHY7257 | <i>MATa his3Δ200 leu2-3,112 ura3-52 lys2-801 trp1-1 gal2 RPN8-GFP(S65T):HIS3MX6</i>                                    | R. Tomko, MH lab strain |

|         |                                                                                                                                                                                                                                         |                            |
|---------|-----------------------------------------------------------------------------------------------------------------------------------------------------------------------------------------------------------------------------------------|----------------------------|
| MHY8602 | <i>MATa his3Δ200 leu2-3,112 ura3-52 lys2-801 trp1-1 gal2 NUP49-GFP:HIS5 RPN5-mCherry:natMX</i>                                                                                                                                          | R. Tomko,<br>MH lab strain |
| MHY8748 | <i>MATa his3Δ200 leu2-3,112 ura3-52 lys2-801 trp1-1 gal2 RPN8-GFP(S65T):HIS3MX6 rpn12-234Δ:hphMX4</i>                                                                                                                                   | R. Tomko,<br>MH lab strain |
| MHY9039 | <i>MATa his3 ura3 leu2-3,112</i> . This strain is a hybrid between MHY500 and W303, has some combination of <i>trp1-1</i> , <i>lys2-801</i> , <i>ade2-1</i> , <i>can1-100</i><br><i>NUP49-GFP:HIS5 RPN5-mCherry:natMX sem1Δ::kanMX6</i> | This study                 |
| MHY9059 | <i>MATa his3 ura3 leu2-3,112</i> . This strain is a hybrid between MHY500 and W303, has some combination of <i>trp1-1</i> , <i>lys2-801</i> , <i>ade2-1</i> , <i>can1-100</i><br><i>NUP49-GFP:HIS5 RPN5-mCherry:natMX rpn11-1</i>       | This study                 |
| MHY9134 | <i>MATa his3Δ200 leu2-3,112 ura3-52 lys2-801 trp1-1 gal2 sem1Δ::kanMX6</i>                                                                                                                                                              | This study                 |
| MHY9172 | <i>MATa his3Δ200 leu2-3,112 ura3-52 lys2-801 trp1-1 gal2 sem1Δ::kanMx6 RPN5-GFP(S65T):HIS3MX6 PRE1-mCherry:NAT</i>                                                                                                                      | This study                 |
| MHY9174 | <i>MATa his3Δ200 leu2-3,112 ura3-52 lys2-801 trp1-1 gal2 RPN5-GFP(S65T):HIS3MX6 RPN2-mCherry:NAT sem1Δ::kanMx6</i>                                                                                                                      | This study                 |
| MHY9509 | <i>MATa his3Δ200 leu2-3,112 ura3-52 lys2-801 trp1-1 gal2 rpn11-1/pRS426-RPN11</i>                                                                                                                                                       | This study                 |
| MHY9573 | <i>MATa his3Δ200 leu2-3,112 ura3-52 lys2-801 trp1-1 gal2 RPN2-GFP(S65T):kanMX6 rpn11-1/pRS316-RPN11</i>                                                                                                                                 | This study                 |
| MHY9579 | <i>MATalpha his3Δ200 leu2-3,112 ura3-52 lys2-801 trp1-1 gal2 sts1Δ::hphMX4/pRS316-STSI</i>                                                                                                                                              | This study                 |
| MHY9580 | <i>MATa his3Δ200 leu2-3,112 ura3-52 lys2-801 trp1-1 gal2 sts1Δ::hphMX4/pRS316-STSI</i>                                                                                                                                                  | This study                 |
| MHY9581 | <i>MATa his3Δ200 leu2-3,112 ura3-52 lys2-801 trp1-1 gal2 PRE1-mCherry:NAT rpn11-1/pRS426-RPN11</i>                                                                                                                                      | This study                 |

|         |                                                                                                              |            |
|---------|--------------------------------------------------------------------------------------------------------------|------------|
| MHY9583 | <i>MATalpha his3Δ200 leu2-3,112 ura3-52 lys2-801 trp1-1 gal2 RPN5-GFP(S65T):HIS3MX6 rpn11-1/pRS426-RPN11</i> | This study |
| MHY9690 | <i>MATalpha ade2-1 his3-11,15 leu2-3,112 trp1 ura3-1 can1-100 STS1 (W303)</i>                                | This study |
| MHY9691 | <i>MATalpha ade2-1 his3-11,15 leu2-3,112 trp1 ura3-1 can1-100 sts1-2 (W303)</i>                              | This study |
| MHY9692 | <i>MATa ade2-1 his3-11,15 leu2-3,112 trp1 ura3-1 can1-100 STS1 (W303)</i>                                    | This study |
| MHY9693 | <i>MATa ade2-1 his3-11,15 leu2-3,112 trp1 ura3-1 can1-100 sts1-2 (W303)</i>                                  | This study |

**Table S2: Plasmids Used in this Study**

| <i>Plasmid</i> | <i>Description</i>                     | <i>Source</i>          |
|----------------|----------------------------------------|------------------------|
| 2-8-6          | pRS314                                 | (Sikorski et al. 1989) |
| 16-6-3         | p414GPD                                | (Mumberg et al. 1995)  |
| 57-4-2         | pRS316-RPN5-GFP-FLAG                   | (Nemec et al. 2019)    |
| 59-4-1         | P415GPD                                | (Mumberg et al. 1995)  |
| 61-7-6         | pGEX-2TK-Sts1                          | (Chen et al. 2011)     |
| 71-3-8         | pET42b-Rpn3:Sem1:HA-Rpn7               | (R. Tomko, MH lab)     |
| 72-5-4         | pET42b-Rpn3:Sem1:HA-Rpn7:Rpn12         | (R. Tomko, MH lab)     |
| 73-4-5         | pCDF42b-6His-Rpn6:Rpn9:Rpn11:Rpn5:Rpn8 | (Tomko et al. 2015)    |
| 80-3-7         | pGEX6P1-Srp1                           | (J. Ronau, MH lab)     |
| 90-9-6         | pRS316-STs1                            | This study             |
| 91-2-5         | p415MET25-STs1-GFP                     | This study             |
| 91-2-6         | p415GPD-STs1-GFP                       | This study             |
| 91-3-7         | p415MET25-sts1R38D-GFP                 | This study             |
| 91-3-8         | p415MET25-sts1C194Y-GFP                | This study             |
| 91-3-9         | p415GPD-sts1R38D-GFP                   | This study             |
| 91-4-3         | pRS314-STs1                            | This study             |
| 91-4-4         | pRS314-sts1R38D,R65D                   | This study             |
| 91-4-5         | pGPD414-STs1                           | This study             |
| 91-4-6         | pGPD414-sts1R38D,R65D                  | This study             |
| 91-6-4         | pET42b-STs1-6His                       | This study             |
| 91-7-9         | pRS314-sts1R38D                        | This study             |
| 91-8-5         | p415GPD-sts1R38D,R65D-GFP              | This study             |
| 91-9-8         | p415GPD-sts1-R65D-GFP                  | This study             |
| 92-1-1         | p415MET25-sts1( $\Delta$ 4-75)-GFP     | This study             |
| 94-3-1         | p415MET25-sts1( $\Delta$ 4-57)-GFP     | This study             |
| 94-3-2         | p415MET25-sts1(1-116)-GFP              | This study             |
| 94-3-3         | p415MET25-sts1(1-180)-GFP              | This study             |
| 94-3-4         | p415MET25-sts1(1-245)-GFP              | This study             |
| 94-3-5         | p415MET25-sts1(1-276)-GFP              | This study             |

|        |                                  |            |
|--------|----------------------------------|------------|
| 94-5-3 | p415MET25-sts1R38D,R65D-GFP      | This study |
| 94-5-4 | p415MET25-sts1R65D-GFP           | This study |
| 95-5-1 | pET42b-sts1(C194Y)-6His          | This study |
| 95-6-6 | pET42-sts1R38D, R65D-6His        | This study |
| 96-2-2 | p415GPD-SV40-STs1-GFP            | This study |
| 96-2-3 | p415GPD-SV40-sts1R38D,R65D-GFP   | This study |
| 98-7-1 | pRS314-sts1-R65D                 | This study |
| 98-7-8 | p415MET25-SV40-STs1-GFP          | This study |
| 98-8-1 | p415MET25-SV40-sts1R38D,R65D-GFP | This study |
